# Supplementary material for: A pharmaceutical hydrogen-bonded covalent organic polymer for enrichment of volatile iodine
Source: Royal Society of Chemistry journal article supplement (doi:10.1039/c7ra09414k), 2017-01-01
Supplement: c7ra09414k1.pdf [file c7ra09414k1.pdf]

Electronic Supplementary Material (ESI) for RSC Advances.

This journal is © The Royal Society of Chemistry 2017

Supporting information for

**A pharmaceutical hydrogen-bonded covalent organic polymer for  
enrichment of volatile iodine**

Lin Lin,<sup>a</sup> Heda Guan,<sup>a</sup> Donglei Zou,<sup>a</sup> Zhaojun Dong,<sup>a</sup> Zhi Liu,<sup>b</sup> Feifan Xu,<sup>a</sup> Zhigang Xie,<sup>c</sup> Yangxue Li<sup>\*a</sup>

<sup>a</sup> *Key Lab of Groundwater Resources and Environment, Ministry of Education, Jilin University, 2519 Jiefangda Road, Changchun 130021, P. R. China.*

<sup>b</sup> *Changchun Institute of Urban Planning and Design, Changchun 13000, P. R. China.*

<sup>c</sup> *State Key Laboratory of Polymer Physics and Chemistry, Changchun Institute of Applied Chemistry, Chinese Academy of Sciences, 5625 Renmin Street, Changchun 130022, P. R. China*

Contents

1. Synthesis
2. Characterization
3. FT-IR spectra
4. PXRD spectrum
5. TGA curve
6. Iodine enrichment test
7. Reference

## 1. Synthesis

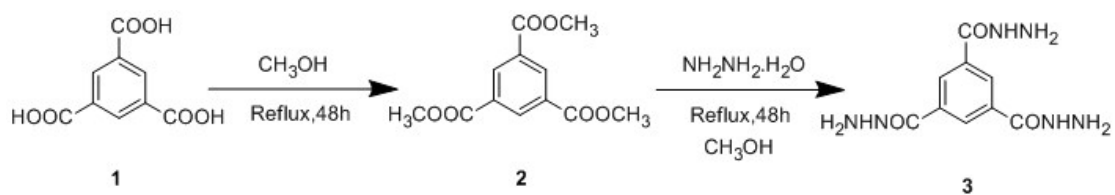

Scheme S1 General synthetic routes.

## 2. Characterization

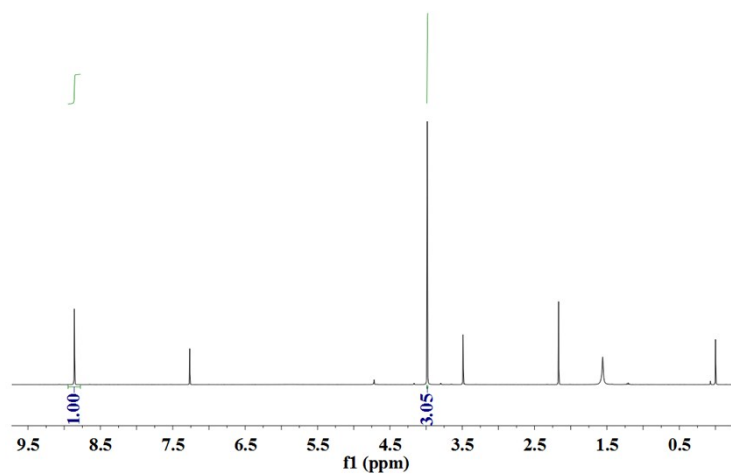

Fig. S1  $^1\text{H}$  NMR spectrum of trimethyl benzene-1,3,5-tricarboxylate (2).

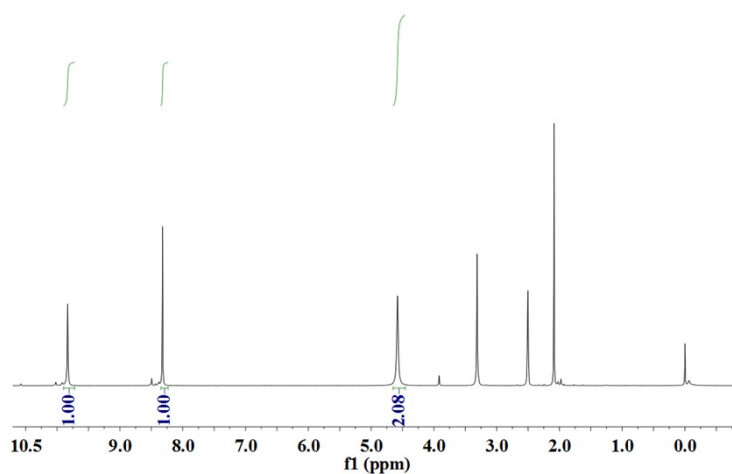

Fig. S2  $^1\text{H}$  NMR spectrum of benzene-1,3,5-tricarbohydrazide (3).

### 3. FT-IR spectra

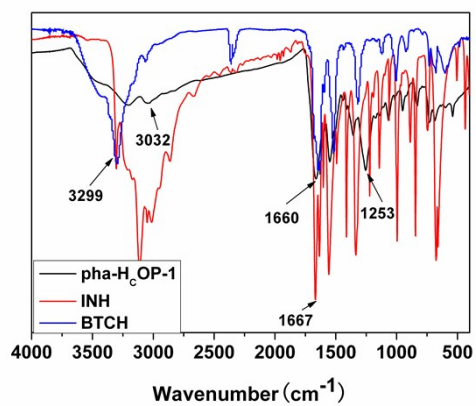

Fig. S3 FT-IR spectra of pha-H<sub>c</sub>OP-1, INH and BTCH.

### 4. PXRD spectrum

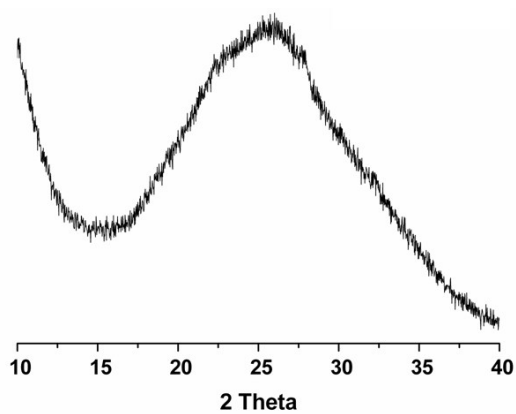

Fig. S4 PXRD spectrum of of pha-H<sub>c</sub>OP-1.

### 5. TGA curve

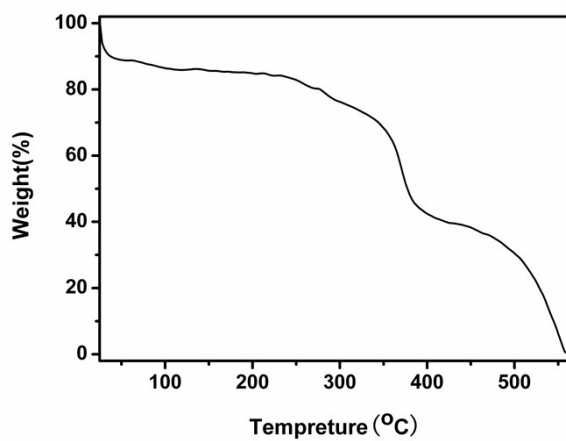

Fig. S5 TGA curve of of pha-H<sub>c</sub>OP-1.

## 6. Iodine enrichment test

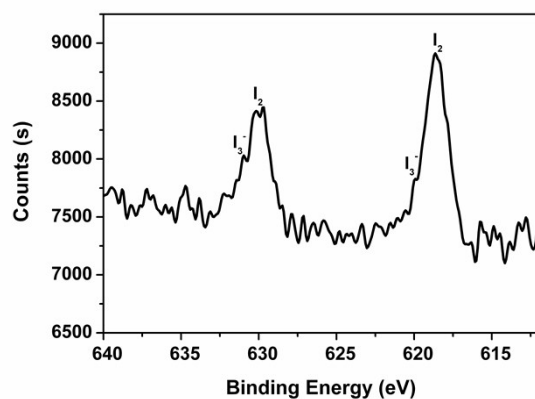

Fig. S6 XPS spectrum of  $I_2@ pha-H_cOP-1$  after washed by ethanol.

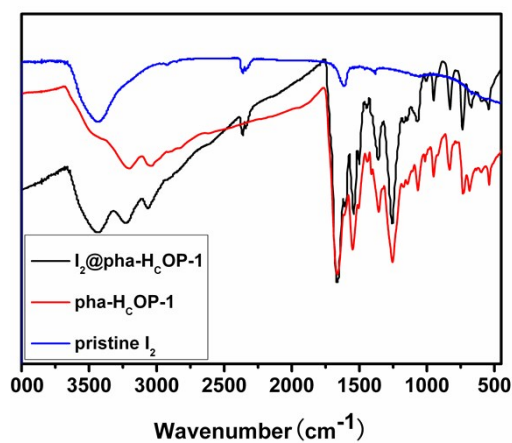

Fig. S7 FT-IR spectra of pristine  $I_2$ ,  $pha-H_cOP-1$ , and  $I_2@ pha-H_cOP-1$ .

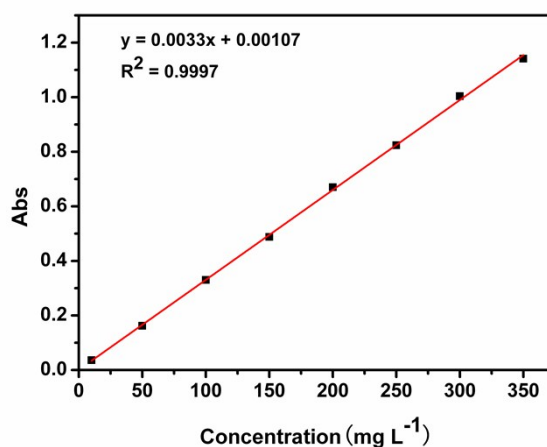

Fig. S8 Calibration plot of standard iodine in hexane solutions obtained by UV-Vis spectrophotometer at 525 nm.

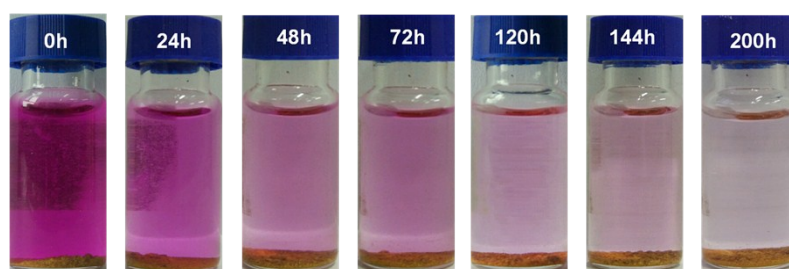

Fig. S9 Photographs showing the visual color change of iodine enrichment progress when 10 mg of pha-H<sub>C</sub>OP-1 was immersed in a hexane solution of iodine (1000 mg L<sup>-1</sup>, 10 mL).

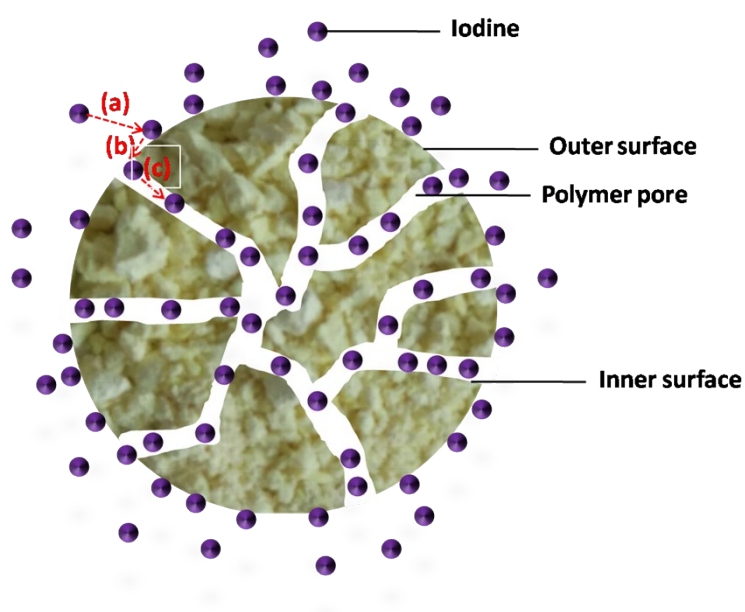

Fig. S10 The adsorption process: (a) External diffusion; (b) Internal diffusion; (c) Adsorption.

Table S1. Iodine adsorption properties of porous materials.

| No. | Adsorbent                                                              | Temperature [°C] | Adsorbent Capacity [mg I <sub>2</sub> /g] | References |
|-----|------------------------------------------------------------------------|------------------|-------------------------------------------|------------|
| 1.  | Activated carbon                                                       | 75               | 30                                        | [1]        |
| 2.  | Cg-5P                                                                  | ~25              | 87                                        | [2]        |
| 3.  | [Zn(C <sub>6</sub> H <sub>8</sub> O <sub>8</sub> )]·~2H <sub>2</sub> O | 19               | 166                                       | [3]        |
| 4.  | Cg-5C                                                                  | ~25              | 239                                       | [2]        |
| 5.  | Ag@Mon-POF                                                             | 70               | 250                                       | [4]        |

|     |                                                                                 |     |       |           |
|-----|---------------------------------------------------------------------------------|-----|-------|-----------|
| 6.  | Ag@Zeolite Mordenites                                                           | 95  | 275   | [5]       |
| 7.  | CC3                                                                             | ~20 | 364   | [6]       |
| 8.  | [Cd(L) <sub>2</sub> (ClO <sub>4</sub> ) <sub>2</sub> ] $\cdot$ H <sub>2</sub> O | ~25 | ~460  | [7]       |
| 9.  | CMPN-1                                                                          | 70  | 970   | [8]       |
| 10. | CMPN-2                                                                          | 70  | 1100  | [8]       |
| 11. | ZIF-8                                                                           | 75  | 1200  | [9]       |
| 12. | PU1                                                                             | 70  | 1300  | [10]      |
| 13. | pha-H <sub>C</sub> OP-1                                                         | 80  | ~1310 | This work |
| 14. | HKUST-1                                                                         | 75  | ~1500 | [9]       |
| 15. | NTP                                                                             | 75  | 1800  | [1]       |
| 16. | CMPN-3                                                                          | 70  | 2080  | [8]       |
| 17. | PAF-25                                                                          | 75  | ~2600 | [11]      |
| 18. | PAF-23                                                                          | 75  | ~2710 | [11]      |
| 19. | PAF-24                                                                          | 75  | ~2760 | [11]      |

## 7. Reference

- S1. H. Ma, J. J. Chen, L. X. Tan, J. H. Bu, Y. H. Zhu, B. E. Tan and C. Zhang, *ACS Macro Lett.*, 2016, **5**, 1039–1043.
- S2. B. J. Riley, J. Chun, J. V. Ryan, J. Matyáš, X. S. Li, D. W. Matson, S. K. Sundaram, D. M. Strachan, J. D. Vienna, *RSC Adv.*, 2011, **1**, 1704–1715.
- S3. B. F. Abrahams, M. Moylan, S. D. Orchard, R. Robson, *Angew. Chem. Int. Ed.*, 2003, **42**, 1848–1851.
- S4. A. P. Katsoulidis, J. Q. He, M. G. Kanatzidis, *Chem. Mater.*, 2012, **24**, 1937–1943.
- S5. K. W. Chapman, P. J. Chupas, T. M. Nenoff, *J. Am. Chem. Soc.*, 2010, **132**, 8897–8899.
- S6. T.; Hasell, M. Schmidtman, A. I. Cooper, *J. Am. Chem. Soc.*, 2011, **133**, 14920–14923.
- S7. Q. K. Liu, J. P. Ma, Y. B. Dong, *Chem. Commun.*, 2011, **47**, 7185–7187.
- S8. Y. F. Chen, H. X. Sun, R. X. Yang, T. T. Wang, C. J. Pei, Z. T. Xiang, Z. Q. Zhu, W. D. Liang,

A. Li, W. Q. Deng, *J. Mater. Chem. A*, 2015, **3**, 87-91.

S9. D. F. Sava, T. J. Garino, T. M. Nenoff, *Ind. Eng. Chem. Res.*, 2012, **51**, 614-620.

S10. Y. Wang, G. A. Sotzing, R. A. Weiss, *Polymer*, 2006, **47**, 2728-2740.

S11. Z. J. Yan, Y. Yuan, Y. Y. Tian, D. M. Zhang, G. S. Zhu, *Angew. Chem. Int. Ed.*, 2015, **54**,  
12733-12737.
